# Supplementary material for: Sequencing Ultrarare Targets with Compound Nucleic Acid Cytometry
Source: PubMed Central journal article supplement — Anal Chem. 2021 May 10;93(20):7422–9. doi: 10.1021/acs.analchem.0c04749 (PMC9022902; doi:10.1021/acs.analchem.0c04749), 2021-05-10
Supplement: ac0c04749_si_001.pdf [file ac0c04749_si_001.pdf]

## Supplementary Information

### Sequencing ultra-rare targets with compound nucleic acid cytometry

Chen Sun<sup>1</sup>, Kai-Chun Chang<sup>1</sup> and Adam R. Abate<sup>1,2,3\*</sup>

<sup>1</sup> Department of Bioengineering and Therapeutic Sciences, University of California San Francisco, San Francisco, CA 94158, USA

<sup>2</sup> California Institute for Quantitative Biosciences, University of California San Francisco, San Francisco, CA 94158, USA

<sup>3</sup> Chan Zuckerberg Biohub, San Francisco, CA 94158, USA

\* Corresponding author: [adam@abatelab.org](mailto:adam@abatelab.org)

### Table of Contents

Derivation of equations for enrichment power

Figure S1. Fluorescence images of droplets showing TaqMan sets reliably detect  $\Phi$ X 174 DNA

Figure S2. Gel images showing minimal DNA fragmentation during thermo cycling using 86 °C denaturation.

Table S1. A list of  $C_t$  values from the qPCR plots for single and double NACS

Table S2: A list of primers and probes used for compound enrichment of  $\Phi$ X 174 DNA

Table S3: A list of primers and probes used for compound enrichment of HIV provirus DNA

## Derivation of equations for enrichment power

We define the enrichment power as the ratio of target purity in the sample after enrichment to before,

$$\text{Enrichment power} = \frac{\text{Target purity after enrichment}}{\text{Target purity before enrichment}} \quad (1)$$

where  $N_T$  is the number of target molecules,  $N_O$  is the total number of off-target molecules,  $D$  is the total number of droplets and  $f$  is the false positive rate of the assay. In the mixed DNA sample, the total number of molecules is  $N_T + N_O$  and thus

$$\text{Target purity before enrichment} = \frac{N_T}{N_T + N_O} \quad (2)$$

We encapsulate these  $N_T + N_O$  molecules into  $D$  droplets, such that each drop contains  $\frac{N_T + N_O}{D}$  molecules. The DNA mixture is partitioned at limiting dilution such that individual droplets rarely contain more than one target expected by Poisson statistics, thus  $N_T$  drops are PCR positive. We also expect  $fD$  false positive drops. Because the false positive rate is generally small and the target is ultra-rare, the instances of false positive and true positive in the same droplet are infrequent. In together,  $N_T + fD$  drops are sorted and the number of molecules in the sorted sample is  $\frac{N_T + N_O}{D}(N_T + fD)$ , of which  $N_T$  molecules are the targeted ones. Therefore,

$$\text{Target purity after enrichment} = \frac{N_T}{\frac{N_T + N_O}{D}(N_T + fD)} \quad (3)$$

and to simplify the enrichment power to

$$\text{Enrichment power} = \frac{\frac{N_T}{\frac{N_T + N_O}{D}(N_T + fD)}}{\frac{N_T}{N_T + N_O}} = \frac{1}{\frac{N_T}{D} + f} \quad (4)$$

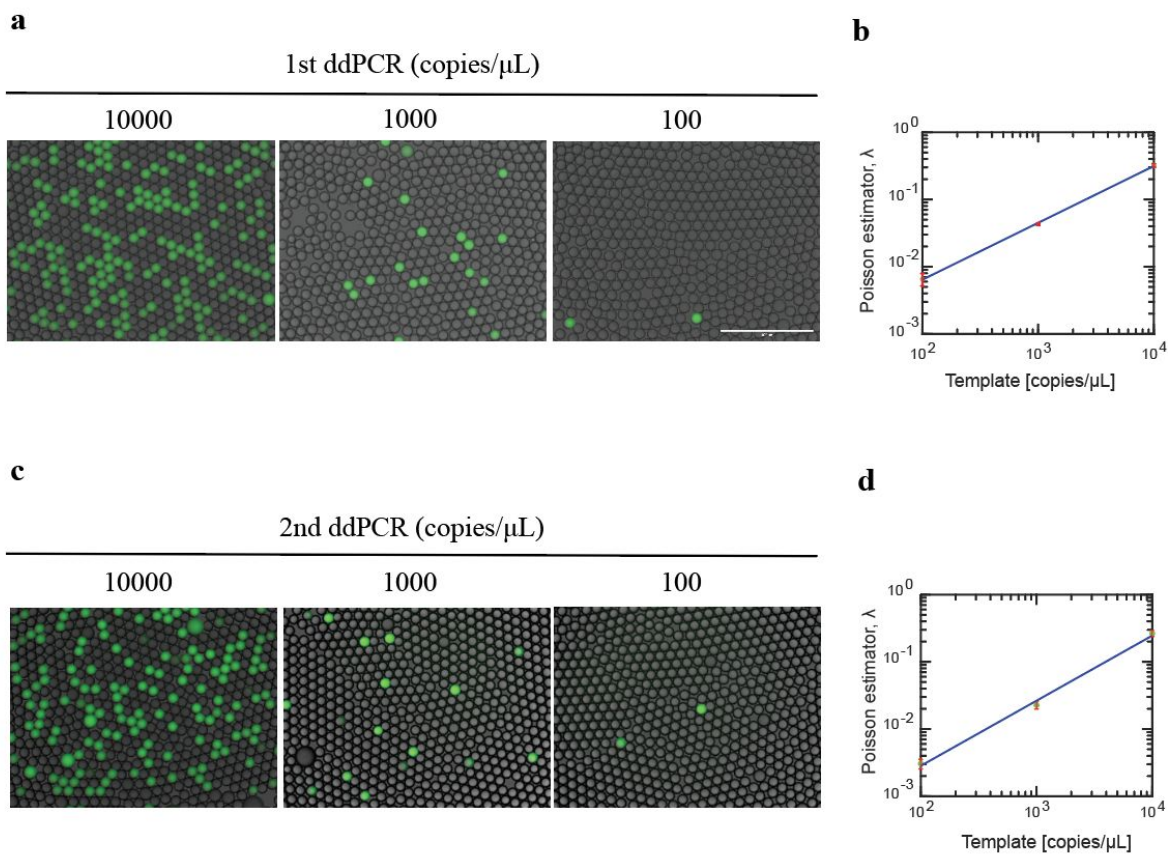

**Figure S1.** TaqMan sets reliably detect  $\Phi$ X 174 DNA in compound NAC. Fluorescence images of droplets after PCR amplification with TaqMan sets used in **(a)** 1<sup>st</sup> NAC and **(c)** 2<sup>nd</sup> NAC for  $\Phi$ X 174 DNA templates at varying concentrations. 5 ng/ $\mu$ L Lambda DNA was added to each reaction to confirm the specificity of the TaqMan sets. The template copy number per droplet estimated by assuming a Poisson distribution scales with the input template concentrations during ddPCR in **(b)** 1<sup>st</sup> NAC, and **(d)** 2<sup>nd</sup> NAC.

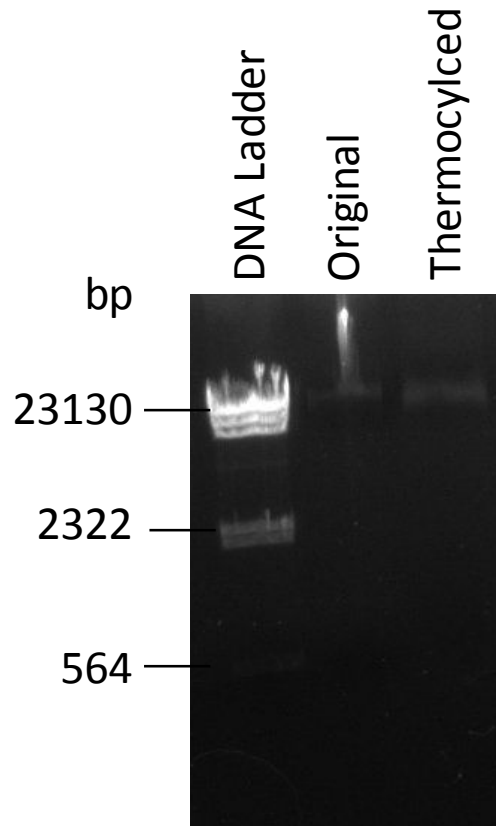

**Figure S2.** Gel analysis showing minimal DNA fragmentation during thermo cycling using 86 °C denaturation. Lane 1, DNA ladders; Lane 2, DNA extracted from a human cell line; Lane 3, DNA went through 35 cycles of thermal cycling with 86 °C denaturation.

**Table S1:  $C_t$  values from the qPCR plots for single and double enrichment**

|              | Single enrichment |                   |              | Double enrichment |                   |              |
|--------------|-------------------|-------------------|--------------|-------------------|-------------------|--------------|
|              | unsort $C_t$      | single sort $C_t$ | $\Delta C_t$ | unsort $C_t$      | double sort $C_t$ | $\Delta C_t$ |
| $\Phi$ X 174 | 33.18             | 28.655            | -4.525       | 33.180            | 31.193            | -1.987       |
| Lambda       | 15.055            | 17.733            | 2.68         | 15.055            | 27.020            | 11.965       |

**Table S2: Primers and probes for compound enrichment of  $\Phi$ X 174 virus DNA**

| Primer Name         | Sequence (5 $\rightarrow$ 3')                  |
|---------------------|------------------------------------------------|
| 1 <sup>st</sup> NAC |                                                |
| $\Phi$ X 174 probe1 | /56-FAM/TAAATCGAA/ZEN/GTGGACTGCTGGCGG/3IABkFQ/ |
| $\Phi$ X 174 F1     | GCAGGAATTACTACTGCTTGTTTAC                      |
| $\Phi$ X 174 R1     | GAATCGTTAGTTGATGGCGAAAG                        |
| 2 <sup>nd</sup> NAC |                                                |
| $\Phi$ X 174 probe2 | /56-FAM/CGTATGCAG/ZEN/GGCGTTGAGTTC/3IABkFQ/    |
| $\Phi$ X 174 F2     | GCAGATGGATAACCGCATCA                           |
| $\Phi$ X 174 R2     | CCTTATGGCCGTCAACATACA                          |
| Post sorting qPCR   |                                                |
| $\Phi$ X 174 probe3 | /56-FAM/ATGGAAGT/ZEN/ACCAAACGT/3IABkFQ/        |
| $\Phi$ X 174 F3     | GCGCTCTAATCTCTGGGCAT                           |
| $\Phi$ X 174 R3     | CAAAGAAACGCGGCACAGAA                           |
| lambda probe3       | /5Cy5/TGAGGTGCT/TAO/TTATGACTCTGCCGC/3IAbrQSp/  |
| lambda F            | GCGAGTATCCGTACCATTTCAG                         |
| lambda R            | TCCCTTTCGGCATACCATTT                           |

**Table S3: Primers and probes for compound enrichment of HIV provirus DNA**

| Primer Name         | Fluorophore, quencher | Sequence (5→3')                        |
|---------------------|-----------------------|----------------------------------------|
| 1 <sup>st</sup> NAC |                       |                                        |
| <i>pol</i> probe    | FAM, ZEN-3'IBFQ       | AAGCCAGGAATGGATGGCC                    |
| <i>pol</i> F        |                       | /5Biosg/ GCACTTTAAATTTTCCCATTAGYCCTA   |
| <i>pol</i> R        |                       | /5Biosg/ CAAATTTCTACTAATGCTTTTATTTTTTC |
| 2 <sup>nd</sup> NAC |                       |                                        |
| LTR probe           | FAM, ZEN-3'IBFQ       | CTGGTAACTAGAGATCCCT                    |
| LTR F               |                       | GCCTCAATAAAGCTTGCCTTGA                 |
| LTR R               |                       | GCTAGAGATTTTCCACACTGACTARA             |
| <i>tat</i> probe    | Cy5, TAO-3'IBRQSp     | CTATGGCAGGAAGAAGCGGAGACAGC             |
| <i>tat</i> F        |                       | TGTAAAAAGTGTTGCYTTTCATTG               |
| <i>tat</i> R        |                       | ACTACTTACTGCTTTGRTAGAG                 |
